# Supplementary material for: Comprehensive Approach to Genomic and Immune Profiling: Insights of a Real-World Experience in Gynecological Tumors
Source: Diagnostics (Basel). 2022 Aug 6;12(8):1903. doi: 10.3390/diagnostics12081903 (PMC9406465; doi:10.3390/diagnostics12081903)
Supplement: Supplementary file 1 [file diagnostics-12-01903-s001.zip]

Archive with 8 entries (8 files):
- Figure S1.pdf
- Figure S2.pdf
- Table S1. OCA v3 gene list.xlsx
- Table S2. List of antibodies.pdf
- Table S3. OCA v3 RAW DATA.xlsx
- Table S4. OCA ssm vs TCGA ssm.xlsx
- Table S5. Her2 by histological subtype_2.pdf
- Table S6. Costs testing strategy.pdf
