# Supplementary material for: Comprehensive Approach to Genomic and Immune Profiling: Insights of a Real-World Experience in Gynecological Tumors
Source: Diagnostics (Basel). 2022 Aug 6;12(8):1903. doi: 10.3390/diagnostics12081903 (PMC9406465; doi:10.3390/diagnostics12081903)
Supplement: Supplementary file 1 [file diagnostics-12-01903-s001.zip › Table S1. OCA v3 gene list.xlsx]

## Sheet: OCA v3 gene list
Table S1. OCA v3 gene list and associated genetic aberrations
Gene	hotspot	full length	copy number	gene fusions
AKT1	hotspot	-	copy number	-
AKT2	hotspot	-	copy number	gene fusions
AKT3	hotspot	-	copy number	-
ALK	hotspot	-	copy number	gene fusions
AR	hotspot	-	copy number	gene fusions
ARAF	hotspot	-	-	-
ARID1A	-	full length	-	-
ATM	-	full length	-	-
ATR	-	full length	-	-
ATRX	-	full length	-	-
AXL	hotspot	-	copy number	gene fusions
BAP1	-	full length	-	-
BRAF	hotspot	-	copy number	gene fusions
BRCA1	-	full length	-	gene fusions
BRCA2	-	full length	-	gene fusions
BTK	hotspot	-	-	-
CBL	hotspot	-	-	-
CCND1	hotspot	-	copy number	-
CCND2	-	-	copy number	-
CCND3	-	-	copy number	-
CCNE1	-	-	copy number	-
CDK12	-	full length	-	-
CDK2	-	-	copy number	-
CDK4	hotspot	-	copy number	-
CDK6	hotspot	-	copy number	-
CDKN1B	-	full length	-	-
CDKN2A	-	full length	-	gene fusions
CDKN2B	-	full length	-	-
CHEK1	-	full length	-	-
CHEK2	hotspot	-	-	-
CREBBP	-	full length	-	-
CSF1R	hotspot	-	-	-
CTNNB1	hotspot	-	-	-
DDR2	hotspot	-	-	-
EGFR	hotspot	-	copy number	gene fusions
ERBB2	hotspot	-	copy number	gene fusions
ERBB3	hotspot	-	-	-
ERBB4	hotspot	-	-	gene fusions
ERCC2	hotspot	-	-	-
ERG	-	-	-	gene fusions
ESR1	hotspot	-	copy number	gene fusions
ETV1	-	-	-	gene fusions
ETV4	-	-	-	gene fusions
ETV5	-	-	-	gene fusions
EZH2	hotspot	-	-	-
FANCA	-	full length	-	-
FANCD2	-	full length	-	-
FANCI	-	full length	-	-
FBXW7	-	full length	-	-
FGF19	-	-	copy number	-
FGF3	-	-	copy number	-
FGFR1	hotspot	-	copy number	gene fusions
FGFR2	hotspot	-	copy number	gene fusions
FGFR3	hotspot	-	copy number	gene fusions
FGFR4	hotspot	-	copy number	-
FGR	-	-	-	gene fusions
FLT3	hotspot	-	copy number	gene fusions
FOXL2	hotspot	-	-	-
GATA2	hotspot	-	-	-
GNA11	hotspot	-	-	-
GNAQ	hotspot	-	-	-
GNAS	hotspot	-	-	-
H3F3A	hotspot	-	-	-
HIST1H3B	hotspot	-	-	-
HNF1A	hotspot	-	-	-
HRAS	hotspot	-	-	-
IDH1	hotspot	-	-	-
IDH2	hotspot	-	-	-
IGF1R	-	-	copy number	-
JAK1	hotspot	-	-	-
JAK2	hotspot	-	-	gene fusions
JAK3	hotspot	-	-	-
KDR	hotspot	-	-	-
KIT	hotspot	-	copy number	-
KNSTRN	hotspot	-	-	-
KRAS	hotspot	-	copy number	gene fusions
MAGOH	hotspot	-	-	-
MAP2K1	hotspot	-	-	-
MAP2K2	hotspot	-	-	-
MAP2K4	hotspot	-	-	-
MAPK1	hotspot	-	-	-
MAX	hotspot	-	-	-
MDM2	-	-	copy number	-
MDM4	hotspot	-	copy number	gene fusions
MED12	hotspot	-	-	-
MET	hotspot	-	copy number	gene fusions
MLH1	-	full length	-	-
MRE11	-	full length	-	-
MSH2	-	full length	-	-
MSH6	-	full length	-	-
MTOR	hotspot	-	-	-
MYB	-	-	-	gene fusions
MYBL1	-	-	-	gene fusions
MYC	hotspot	-	copy number	-
MYCL	-	-	copy number	-
MYCN	hotspot	-	copy number	-
MYD88	hotspot	-	-	-
NBN	-	full length	-	-
NF1	-	full length	-	gene fusions
NF2	-	full length	-	-
NFE2L2	hotspot	-	-	-
NOTCH1	-	full length	-	gene fusions
NOTCH2	-	full length	-	-
NOTCH3	-	full length	-	-
NOTCH4	-	-	-	gene fusions
NRAS	hotspot	-	-	-
NRG1	-	-	-	gene fusions
NTRK1	hotspot	-	copy number	gene fusions
NTRK2	hotspot	-	copy number	gene fusions
NTRK3	hotspot	-	copy number	gene fusions
NUTM1	-	-	-	gene fusions
PALB2	-	full length	-	-
PDGFRA	hotspot	-	copy number	gene fusions
PDGFRB	hotspot	-	copy number	gene fusions
PIK3CA	hotspot	-	copy number	gene fusions
PIK3CB	hotspot	-	copy number	-
PIK3R1	-	full length	-	-
PMS2	-	full length	-	-
POLE	-	full length	-	-
PPARG	-	-	copy number	gene fusions
PPP2R1A	hotspot	-	-	-
PRKACA	-	-	-	gene fusions
PRKACB	-	-	-	gene fusions
PTCH1	-	full length	-	-
PTEN	-	full length	-	gene fusions
PTPN11	hotspot	-	-	-
RAC1	hotspot	-	-	-
RAD50	-	full length	-	-
RAD51	-	full length	-	-
RAD51B	-	full length	-	gene fusions
RAD51C	-	full length	-	-
RAD51D	-	full length	-	-
RAF1	hotspot	-	-	gene fusions
RB1	-	full length	-	gene fusions
RELA	-	-	-	gene fusions
RET	hotspot	-	-	gene fusions
RHEB	hotspot	-	-	-
RHOA	hotspot	-	-	-
RICTOR	-	-	copy number	-
RNF43	-	full length	-	-
ROS1	hotspot	-	-	gene fusions
RSPO2	-	-	-	gene fusions
RSPO3	-	-	-	gene fusions
SETD2	-	full length	-	-
SF3B1	hotspot	-	-	-
SLX4	-	full length	-	-
SMAD4	hotspot	-	-	-
SMARCA4	-	full length	-	-
SMARCB1	-	full length	-	-
SMO	hotspot	-	-	-
SPOP	hotspot	-	-	-
SRC	hotspot	-	-	-
STAT3	hotspot	-	-	-
STK11	-	full length	-	-
TERT	hotspot	-	copy number	gene fusions
TOP1	hotspot	-	-	-
TP53	-	full length	-	-
TSC1	-	full length	-	-
TSC2	-	full length	-	-
U2AF1	hotspot	-	-	-
XPO1	hotspot	-	-	-
