# Supplementary material for: Comprehensive Approach to Genomic and Immune Profiling: Insights of a Real-World Experience in Gynecological Tumors
Source: Diagnostics (Basel). 2022 Aug 6;12(8):1903. doi: 10.3390/diagnostics12081903 (PMC9406465; doi:10.3390/diagnostics12081903)
Supplement: Supplementary file 1 [file diagnostics-12-01903-s001.zip › Table S2. List of antibodies.pdf]

Table S2. List of antibodies used to determine protein expression of gynecological biomarkers

| Antibody name                                | Target Antigen | Vendor  | Vendor identifier | Host organism | Clonality  | Clone ID      | Dilution | Assessment                                                                                                                                                                 |
|----------------------------------------------|----------------|---------|-------------------|---------------|------------|---------------|----------|----------------------------------------------------------------------------------------------------------------------------------------------------------------------------|
| MutL Protein Homolog 1 antibody              | Human MLH1     | Agilent | IR079             | Mouse         | Monoclonal | ES05          | RTU      | Absence/presence of tumor cell immunoreactivity                                                                                                                            |
| MutS Protein Homolog 2 antibody              | Human MSH2     | Agilent | IR085             | Mouse         | Monoclonal | FE11          | RTU      | Absence/presence of tumor cell immunoreactivity                                                                                                                            |
| MutS Protein Homolog 6 antibody              | Human MSH6     | Agilent | IR086             | Rabbit        | Monoclonal | EP49          | RTU      | Absence/presence of tumor cell immunoreactivity                                                                                                                            |
| Programmed death-ligand 1 antibody           | Human PD-L1    | Agilent | SK006             | Mouse         | Monoclonal | 22C3          | RTU      | Combined positive score (CPS)                                                                                                                                              |
| Postmeiotic Segregation Increased 2 antibody | Human PMS2     | Agilent | IR087             | Rabbit        | Monoclonal | EP51          | RTU      | Absence/presence of tumor cell immunoreactivity                                                                                                                            |
| Anti-Human p53 Protein (Dako Omnis) antibody | Human p53      | Agilent | GA616             | Mouse         | Monoclonal | DO-7          | RTU      | 0-Normal expression,<br>1-overexpression,<br>2-cytoplasmatic expression,<br>3-complete absence<br>0-no staining,<br>1+incomplete membrane staining in <10% of tumor cells, |
| Anti-Human HER2 protein antibody             | Human HER2     | Agilent | SK00121-2         | Rabbit        | Monoclonal | Herceptest(R) | RTU      | 2+ strong complete membrane staining in ≤30% or incomplete in ≥10% and 3+ strong staining in >30% of tumor cells                                                           |

CPS=Number of PD-L1 staining cells (tumor cells, lymphocytes, macrophages)/Total number of viable tumor cells x100
