# Supplementary material for: Comprehensive Approach to Genomic and Immune Profiling: Insights of a Real-World Experience in Gynecological Tumors
Source: Diagnostics (Basel). 2022 Aug 6;12(8):1903. doi: 10.3390/diagnostics12081903 (PMC9406465; doi:10.3390/diagnostics12081903)
Supplement: Supplementary file 1 [file diagnostics-12-01903-s001.zip › Table S4. OCA ssm vs TCGA ssm.xlsx]

## Sheet: Sheet1
Table S4. Comparison of mutation affected cases in cohort with TCGA data
Tumor site FJD	Sample size	Gene	Single somatic mutations (ssm) cases affected in FJD cohort	ssm cases affected in TCGA cohort	Tumor site	Sample size
Ovary,	n=22	TP53	14/22 (64%)	399 / 436 (91.51%)	TCGA-Ov	n=436
		BRCA1	5/22 (23%)	24 / 436 (5.50%)
		FANCD2	3/22 (14%)	13 / 436 (2.98%)
		POLE	3/22 (14%)	13 / 436 (2.98%)
		PMS2	3/22 (14%)
Uterus	n=15	PIK3CA	7/15 (47%)	271 / 529 (51.23%)	TCGA-UCEC	n=529
		PTEN	5/15 (33%)	352 / 529 (66.54%)
		TP53	4/15 (27%)	214 / 529 (40.45%)
		NOTCH1	4/15 (27%)	73 / 529 (13.80%)
		ATM	3/15 (20%)	110 / 529 (20.79%)
		CTNNB1	3/15 (20%)	153 / 529 (28.92%)
		FBXW7	3/15 (20%)	127 / 529 (24.01%)
Cervix,	n=12	PIK3CA	4/12 (33%)	85 / 289 (29.41%)	TCGA-CESC	n=289
		ATM	2/12 (17%)	14 / 289 (4.84%)
		FANCD2	2/12 (17%)
		FANCA	2/12 (17%)
		ATRX	2/12 (17%)
TCGA-Ov=The Cancer Genome Atlas-Ovarian serous cystadenocarcinoma
TCGA-UCEC=The Cancer Genome Atlas-Uterine Corpus endometrial carcinoma
TCGA-CESC=The Cancer Genome Atlas-Cervical squamous cell carcinoma and endocervical
