# Supplementary material for: Comprehensive Approach to Genomic and Immune Profiling: Insights of a Real-World Experience in Gynecological Tumors
Source: Diagnostics (Basel). 2022 Aug 6;12(8):1903. doi: 10.3390/diagnostics12081903 (PMC9406465; doi:10.3390/diagnostics12081903)
Supplement: Supplementary file 1 [file diagnostics-12-01903-s001.zip › Table S5. Her2 by histological subtype_2.pdf]

Table S5. Alterations in ERBB2 by histological subtype

| Patient | Tumor site | Histological subtype | ERBB2 NGS | ERBB2 IHC | ERBB2 FISH |
|---------|------------|----------------------|-----------|-----------|------------|
| 11      | Ovary      | HGSC                 | WT        | 0+        | -          |
| 14      | Ovary      | HGSC                 | CNV       | 3+        | A          |
| 99      | Ovary      | HGSC                 | WT        | 2+        | I          |
| 144     | Ovary      | HGSC                 | WT        | 1+        | -          |
| 189     | Ovary      | HGSC                 | WT        | 1+        | -          |
| 261     | Ovary      | HGSC                 | WT        | 0+        | -          |
| 333     | Ovary      | HGSC                 | WT        | 0+        | -          |
| 349     | Ovary      | HGSC                 | WT        | 0+        | -          |
| 370     | Ovary      | HGSC                 | WT        | 0+        | -          |
| 393     | Ovary      | HGSC                 | WT        | 2+        | A          |
| 436     | Ovary      | HGSC                 | WT        | 0+        | -          |
| 353     | Ovary      | CCC                  | WT        | 2+        | NA         |
| 403     | Ovary      | CCC                  | SNV       | 1+        | -          |
| 77      | Ovary      | Neuro                | WT        | 0+        | -          |
| 65      | Uterus     | Serous               | CNV+SNV   | 2+        | A          |
| 103     | Uterus     | Serous               | WT        | 1+        | -          |
| 163     | Uterus     | Serous               | WT        | 1+        | -          |
| 272     | Uterus     | Serous               | WT        | 0+        | -          |
| 375     | Uterus     | Serous               | SNV       | -         | -          |
| 287     | Uterus     | CCC                  | WT        | 2+        | A          |
| 176     | Uterus     | Endometrioid         | WT        | 0+        | -          |
| 201     | Uterus     | Endometrioid         | SNV       | 2+        | NA         |
| 245     | Uterus     | Endometrioid         | WT        | 0+        | -          |
| 325     | Uterus     | Endometrioid         | WT        | 0+        | -          |
| 437     | Uterus     | Endometrioid         | WT        | 0+        | -          |
| 237     | Uterus     | APA                  | WT        | 0+        | -          |
| 388     | Uterus     | APA                  | WT        | 0+        | -          |
| 36      | Cervix     | ADC                  | WT        | 0+        | NA         |
| 121     | Cervix     | ADC                  | CNV       | -         | -          |
| 146     | Cervix     | Mucinous             | WT        | 1+        | -          |
| 444     | Cervix     | Mucinous             | SNV       | -         | -          |
| 246     | Cervix     | SCC                  | WT        | 0+        | NA         |

APA=atypical polypoid adenomyoma, HGSC=high-grade serous carcinoma, CCC=clear cell carcinoma, CNV=copy number variation, SCC=squamous cell carcinoma, SNV=single nucleotide variant, WT=wild-type, A=amplification, NA=non- amplification, I=indeterminate (non-evaluable due to specimen or assay failure)
