# Supplementary material for: Comprehensive Approach to Genomic and Immune Profiling: Insights of a Real-World Experience in Gynecological Tumors
Source: Diagnostics (Basel). 2022 Aug 6;12(8):1903. doi: 10.3390/diagnostics12081903 (PMC9406465; doi:10.3390/diagnostics12081903)
Supplement: Supplementary file 1 [file diagnostics-12-01903-s001.zip › Table S6. Costs testing strategy.pdf]

Table S6. Testing strategy, total cost and cost difference versus OCA NGS

| Testing strategy                 | n=1          | Ovarian HGSC patients, n=22 |                                |
|----------------------------------|--------------|-----------------------------|--------------------------------|
|                                  | Testing cost | Total cost                  | Cost difference versus OCA NGS |
| TP53                             | 150          | 3300                        | 6512                           |
| BRCA NGS                         | 404          | 8888                        | 924                            |
| PALB2                            | 150          | 3300                        | 6512                           |
| RAD51                            | 150          | 3300                        | 6512                           |
| ERBB2                            | 180          | 3960                        | 5852                           |
| Total conventional testing       | 1034         | 22748                       | 12936                          |
| OCA NGS                          | 446          | 9812                        | -                              |
| PD-L1                            | 161          | 3542                        | -                              |
| TILs                             | 4            | 88                          | -                              |
| Total OCA NGS and immune testing | 611          | 13442                       | 3630                           |

Costs are given in 2017 euros, HGSC=high-grade serous carcinoma, NGS=next-generation sequencing, OCA=oncomine comprehensive assay
